# Supplementary material
Source: Research Square preprint supplement (doi:10.21203/rs.3.rs-8745251/v1)
Supplement: Supplementary file 1 [file 2ff836f90ab3a3c8ff75b3f1.docx]

**Supplementary Information**

**
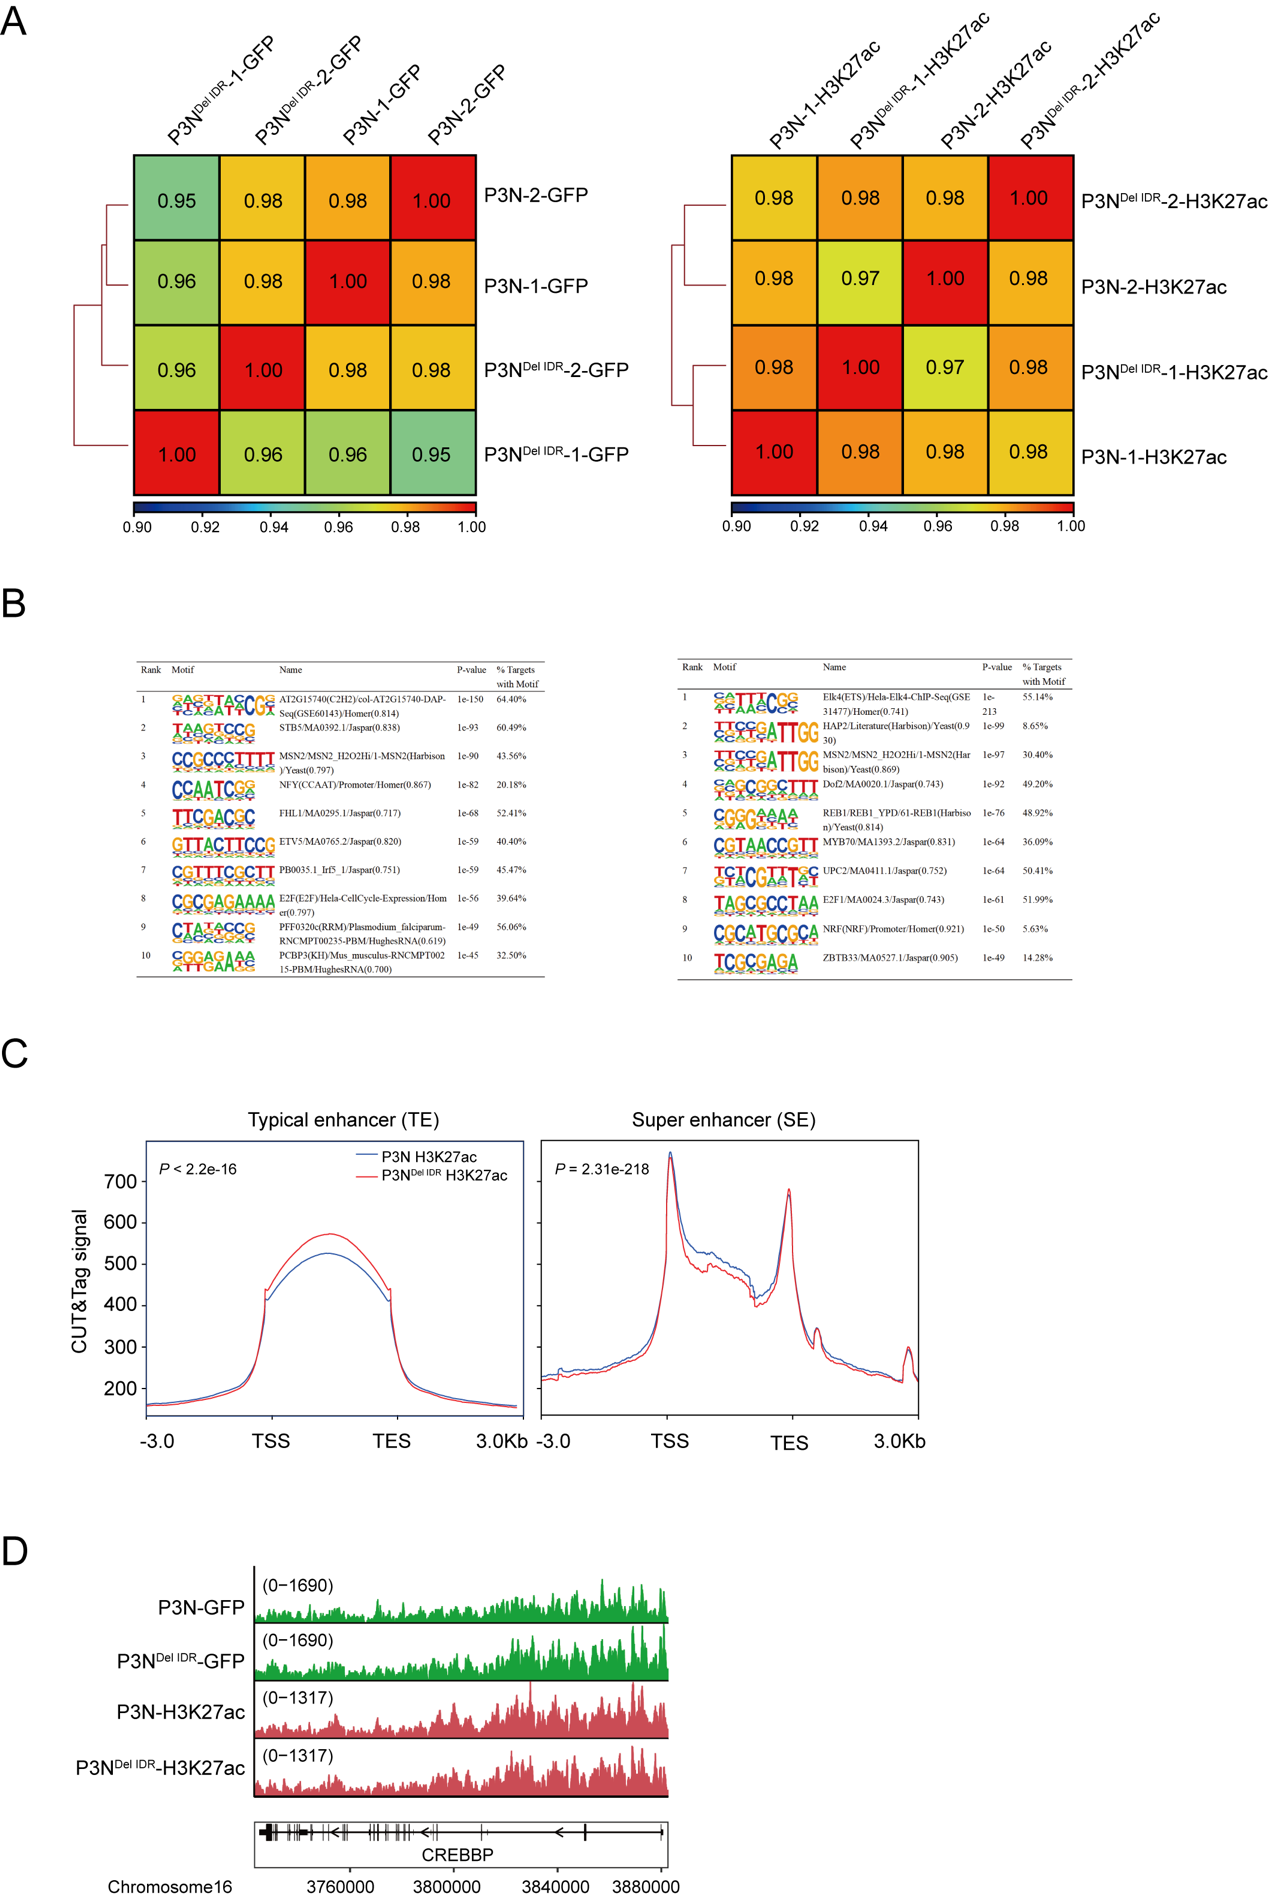
**

**Supplementary Fig. 1 A super-enhancer-like binding pattern at target genomic loci is characteristic for the PAX3NCOA2**

(A) Hierarchical clustered heat maps for the pairwise correlation of CUT&Tag signals across the indicated samples. The coefficients were determined by Pearson correlation. P3N and H3K27ac represent CUT&Tag signals from GFP-tagged PAX3NCOA2 and H3K27ac in P3N and P3NDel IDR groups, respectively.

(B) Summary of the most enriched motifs identified within CUT&Tag peaks for P3N or P3NDel IDR in HEK293T cells.

(C) Normalized read distribution profiles of CUT&Tag signal across typical enhancers (TEs, left) and super-enhancers (SEs, right) in P3N and P3NDel IDR-expressing cells.

(D) Integrative Genomics Viewer (IGV) tracks showing CUT&Tag signals at SE loci, such as the CREBBP gene cluster, in HEK293T cells.


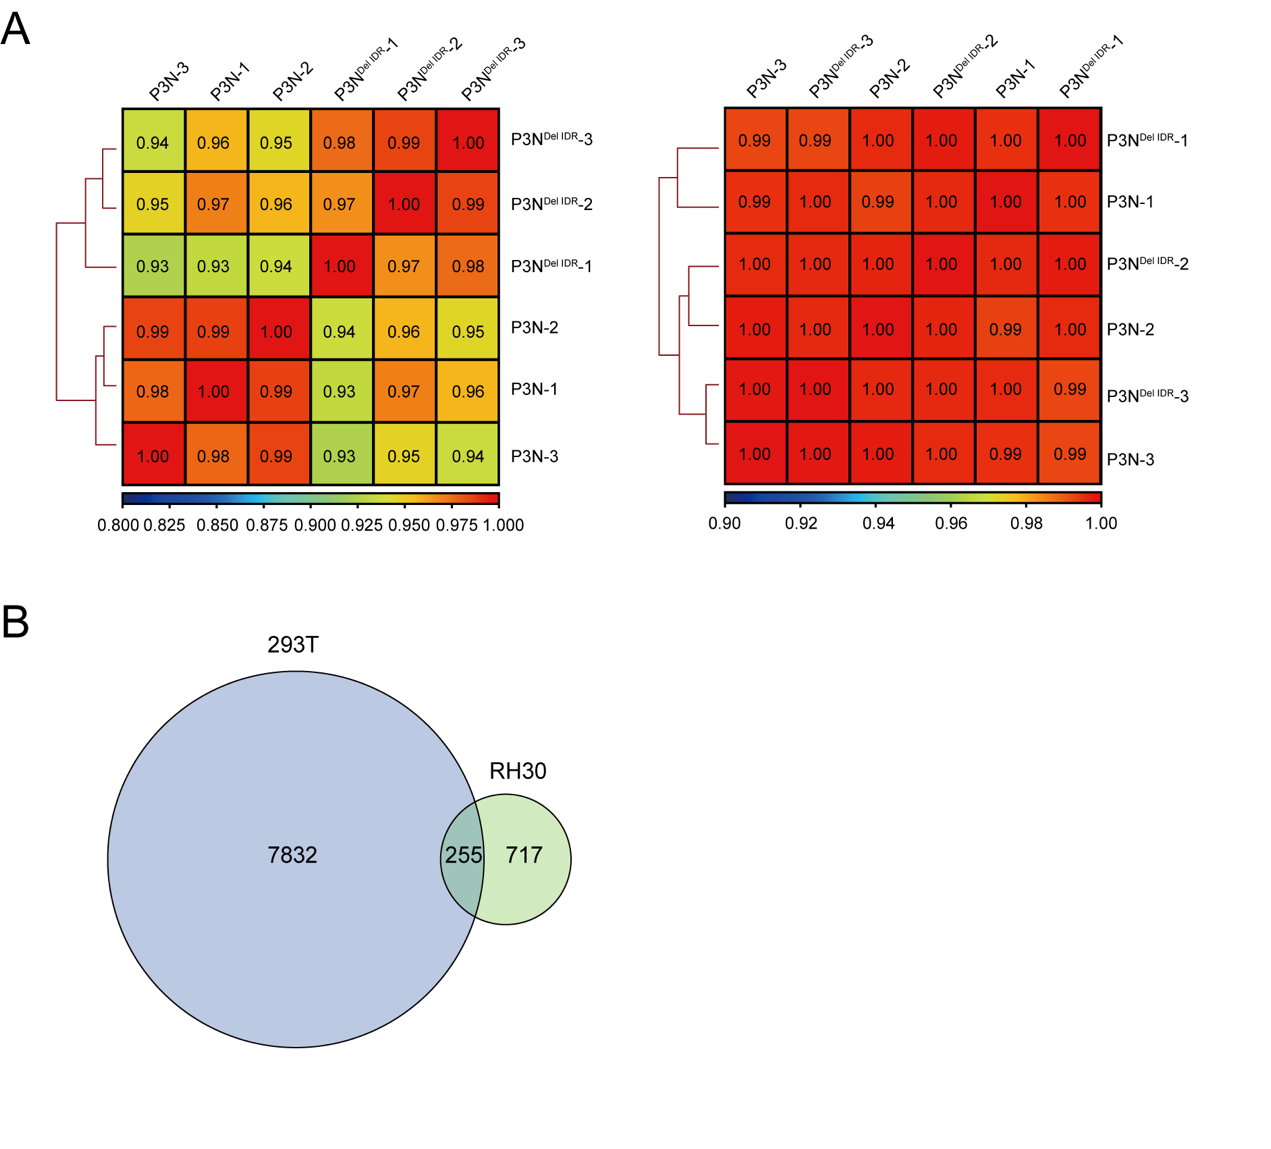


**Supplementary Fig. 2 PAX3NCOA2 affects the transcriptional activation of the downstream oncogenic gene-expression programs in different cell types**

(A) Hierarchical clustered heat maps for the pairwise correlations of RNA-seq signals across the indicated samples. Correlation coefficients were determined by Pearson correlation.

(B) Venn diagram showing the overlap of differentially expressed genes from RNA-seq data between HEK293T and RH30 cells.
