# Supplementary material
Source: Research Square preprint supplement (doi:10.21203/rs.3.rs-8745251/v1)
Supplement: Supplementary file 2 [file 9344ecc0a0afc24ffe44c40f.xlsx]

## Sheet: Sheet1
C19orf12
DNAJB12
MAST2
MYCBP2
NCOA2
PLD1
SLC46A3
SPATA13
AARS1
ABCC2
ABL2
ABLIM1
ACVR1B
AP3D1
ARHGAP20
ASB13
BARHL2
BCAT2
BCORL1
BOC
CACNB2
CCDC8
CDK5RAP2
CHST2
DNM2
DPYSL5
DSTYK
EEF2K
EFL1
EFNA4
FAAP20
FOXJ2
GALK1
GINS3
GRAMD1B
HLX
HMOX2
IFT46
KCTD4
LMNA
MANBAL
MAST1
MGA
MMS22L
MYC
NANS
NEK9
NF2
NLRX1
NT5C2
OCEL1
PAK1
PHF1
PIK3AP1
PLCL2
POLR3H
PSAP
RRP12
SCAP
SH2B1
SHROOM1
SIAH2
SLC7A1
SMAP1
SMG1
SOX4
TFEB
THEM4
TMEM62
TNFRSF1A
TP53BP1
TRERF1
TSPAN5
TXNRD3
UTP4
WASF2
ZMYND8
ZNF827
CENPA
RFXAP
ABHD4
AC008543.1
AC073651.1
ACTR1B
AMDHD1
ANAPC1
ANAPC7
AP2M1
AP4E1
ARHGEF11
ASTE1
ATIC
ATP13A2
ATP6V0E2
B4GALT7
BAG1
BCKDHA
BCRP2
BMP4
BRPF1
C1D
C7orf26
CARS2
CCDC146
CERCAM
CERKL
CFAP58-DT
COA7
COG1
DACT3
DDRGK1
DDX10
DESI1
DOLPP1
DPH7
DUS3L
DZIP1L
EBAG9
EGR1
ELK1
EMC9
FAM104B
FAM189B
FAM53A
FBXL12
FBXO34
FIRRE
FOXK2
FOXRED2
GAR1
GOLPH3L
GPR137
GPT2
GTSE1
GZF1
HLA-C
HMBS
HPS3
HPS6
HROB
HSD17B10
HYAL3
IFIT1
IFT27
IKZF2
ILKAP
INSM2
IP6K1
IVD
KANSL3
KATNBL1
KCNJ8
KIF2C
LASP1
LIN7B
LINC01220
LMAN2L
LRRC8D
LZTS2
MAEA
MKI67
MMP24OS
MORC2
MSANTD4
MTIF2
MYPOP
NAGLU
NAGS
NAT9
NFKBIE
NGRN
NRDC
NRTN
NSL1
NT5C3B
OIP5-AS1
OTUD5
P3H4
PDCD11
PDX1
PGAM5
PHF21A
PIGS
PLTP
PMS2P4
POLD4
PPP1R8
PPP2R5B
PRDM4
PRIM2
PRKAB1
PRMT5
PRPF4
PTGIS
PTPN23
RAB29
RAB35
RAD51D
RBCK1
RGL2
RHOV
RNH1
ROGDI
RPL41
RRN3P1
RRP1
RUFY1
RUSC2
SAP130
SAT1
SCLT1
SCN3B
SCRN2
SEC24C
SFPQ
SIPA1L3
SLC2A1
SLC35E3
SMC1A
SMG9
SNHG7
SNX1
SRSF5
STK11IP
STYXL1
SUN2
SUOX
SUPT6H
TBC1D22B
TERC
TEX264
TFCP2
TJAP1
TMEM94
TRAP1
TRIM4
TRMT61B
TTC30B
TUBAP5
TWF1
UCK1
WIPI2
WRAP53
ZNF133
ZNF189
ZNF445
ZNF446
ZNF570
ZNF672
ZNF703
ZNF747
ZNF839
ZSCAN31
AC092814.2
AL136985.2
AP5B1
ARSG
AXIN2
BAZ2A
BNC1
BPTF
CACHD1
CDK12
CTTN
CUL1
DIRC3
EOMES
ETV6
FAM184A
GALNT2
GTF2IRD1
LCLAT1
LGR5
LRFN5
MAP3K4
MECOM
NPTXR
NSUN4
PIGT
PPM1D
PRKD2
PTPRG-AS1
PXDN
SCAMP5
SH3BP5
STK10
STOX2
TMSB15B
TNRC6C
TRDMT1
TSC22D3
TULP4
ULK4
USP1
USP37
WBP1L
ZNF846
ZNRF3
A4GALT
ABAT
ABHD11
ABR
ABTB2
AC002558.3
AC004034.1
AC004895.1
AC005000.1
AC008897.3
AC010226.1
AC011509.1
AC011511.3
AC012640.1
AC015813.1
AC017104.2
AC020916.1
AC022075.1
AC022395.1
AC022613.1
AC026273.1
AC027237.2
AC048341.2
AC069542.1
AC084024.2
AC087239.1
AC087392.1
AC090152.1
AC090229.1
AC090578.1
AC092835.1
AC093484.3
AC096540.1
AC097359.2
AC103702.2
AC103746.1
AC105219.3
AC107909.1
AC108134.2
AC114684.1
AC116351.2
AC116667.1
AC116913.1
AC122718.2
AC126177.6
AC133552.2
AC138409.2
AC239800.2
AC239860.4
ACAA1
ACHE
ACOT7
ACSBG1
ACSF2
ACSF3
ADAP1
ADCK2
ADCY5
ADCYAP1R1
ADD1
ADD2
ADRA2C
ADSL
AGAP2
AGAP3
AGK
AGPAT2
AGPAT3
AHRR
AIDA
AIFM2
AKR1A1
AKT1
AL022332.1
AL022334.1
AL035587.1
AL096678.1
AL109615.3
AL109917.1
AL117327.1
AL138785.1
AL159972.1
AL161787.1
AL161909.1
AL353743.1
AL358075.2
AL589880.1
AL591499.1
AL596247.1
AL606517.1
AL645728.1
AL662890.1
ALDH1L1
ALKBH4
ALOX12-AS1
AMDHD2
AMOTL1
AMPD1
AMPD2
ANK3
ANKFY1
ANKRD11
ANKRD13A
ANKRD13B
ANKRD17
ANKRD36B
ANKS1A
AP003390.1
AP1B1
APCDD1
APOBEC3F
APOLD1
ARAP3
ARFGAP1
ARHGAP31
ARHGEF18
ARID1A
ARID5A
ARMH3
ARNT2
ARRB1
ARRB2
ARRDC2
ARVCF
ASB1
ASCL2
ASH1L-AS1
ASNSP1
ASPHD2
ATF7
ATG13
ATL3
ATP5PBP1
ATP6AP1L
ATP6V1C2
ATP8B1
ATP8B2
ATP9A
ATXN1
ATXN2
AZIN2
B4GALT1
B4GALT2
BACE1
BARD1
BATF2
BAZ1B
BBS12
BCAR1
BCKDK
BCR
BFSP1
BHLHE41
BICRAL
BMP1
BMP8B
BMPR2
BRAF
BRCA1
BRD3OS
BRD9
BRF1
BRI3
BSN
BTBD6
BX004807.1
BX284668.6
C11orf96
C17orf98
C19orf25
C1orf220
C8orf58
CABIN1
CABLES2
CACNB1
CAD
CAMK2B
CAMTA2
CAPN1
CASC2
CBX4
CCDC130
CCDC136
CCDC184
CCDC186
CCDC192
CCDC26
CCDC57
CCDC92
CCDC97
CCSER2
CCT6P1
CCZ1B
CD83
CDC25C
CDC42BPB
CDC42EP1
CDK19
CDKN2AIP
CDX2
CEBPZ
CELF4
CELSR3
CEP170
CEP170B
CERK
CERS6-AS1
CFAP73
CHD3
CHD4
CHDH
CHGA
CHID1
CHKA
CHRNA7
CHST14
CHST15
CIAPIN1
CIB2
CIC
CIDECP1
CISD3
CKAP4
CLDND1
CLIP2
CLMP
CLN5
CLSTN1
CLU
CMC2
CMPK2
CNBD2
CNNM2
CNOT10
CNP
CNPPD1
COG7
COL13A1
COL21A1
COL9A3
CORO1B
CPT1A
CRACD
CRMP1
CSNK1G2
CST3
CTDSP1
CTDSP2
CTDSPL
CTIF
CTPS2
CTSH
CTTNBP2NL
CUEDC1
CUL5
CXXC4
CYB5R3
DAG1
DALRD3
DBNL
DCAF7
DCAKD
DDB1
DDIT4
DDX6
DEDD
DEGS2
DENND4A
DGCR5
DGKQ
DGKZ
DHRS4L1
DHTKD1
DHX34
DISC1
DISP1
DKK2
DKK3
DMBX1
DNAJB6
DNM3OS
DNMBP
DNMT1
DOC2A
DOK1
DOT1L
DPF1
DPYSL4
DRG1
DRG2
DROSHA
DTNBP1
DTX2
DUS2
DUSP7
DUSP9
E2F2
ECE1
ECSIT
EDC3
EEF1A2
EEF1D
EEFSEC
EGFL7
EGFLAM
EHD4
EIF2AK2
EIF4A3
ELAC2
ELF4
EMID1
EML6
ENKD1
ENKUR
ENO3
ENOX2
EPAS1
EPB41L1
EPDR1
EPHB3
EPOP
EPS15L1
ERAP2
ERF
ERGIC1
ESRP1
ETF1P2
ETFB
ETNK2
ETNPPL
EXO5
EXOC4
EXPH5
EYA2
EZH1
F12
FADS2
FAF1
FAF2
FAM102A
FAM110A
FAM117B
FAM120AOS
FAM120B
FAM149A
FAM160B2
FAM193A
FAM193B
FAM20C
FAM234A
FAM78A
FAM81A
FAM83G
FAM83H
FANCG
FARS2
FAS
FASN
FBLN1
FBXL16
FBXL2
FBXL6
FBXO10
FBXO17
FBXO31
FBXO32
FBXO42
FBXO8
FCGRT
FCHSD1
FGFRL1
FGL1
FHIT
FHL3
FKBP5
FLII
FLNB
FMN2
FN3KRP
FNDC10
FOS
FOXF2
FPGS
FRY
FSBP
FSD1
FURIN
FUT8
FXR1
FZD2
GALE
GALM
GARNL3
GARRE1
GAS1
GATAD2A
GBF1
GCN1
GIGYF1
GIPC3
GLCCI1
GLE1
GLI2
GLIS2
GMEB1
GMPR
GNA11
GNG10
GNG12-AS1
GOLGA2P5
GORASP1
GPATCH8
GPC1
GPR83
GPRC5C
GPRIN1
GPS1
GPSM1
GRAMD1C
GRIN2C
GRK6
GSN
GTDC1
GTF2F1
GTF2IP4
GTF3C1
GUSB
H2AZP2
HADHA
HAPLN2
HDAC11
HDAC5
HDAC7
HELZ
HERC3
HERC4
HIF1AN
HIPK2
HK1
HLA-F
HLCS
HMG20B
HMGA1
HMGB1
HMX2
HOXB13
HOXB4
HOXD3
HSPA1B
HTR7P1
HTRA3
HUNK
HUS1B
IDH3B
IDNK
IFFO2
IFIH1
IFIT2
IFNLR1
IGF2
IGF2BP1
IGFBP6
IGFBP7
IKBKB
IL17D
IL27RA
IL4R
IMPDH1
INPP5A
INPPL1
IQSEC1
IRAK1
IRF7
IRX3
IRX6
ISG20
ITGB1
ITPA
ITPK1
ITPKA
ITPRIPL1
JMJD6
JMY
JUN
KAT6A
KBTBD2
KCMF1
KCNC1
KCNG1
KCNJ12
KCNN1
KCNN2
KCTD1
KCTD17
KDM4B
KEAP1
KHDC1
KIAA0513
KIAA0930
KIAA1217
KIAA1586
KIF1A
KIF25
KIF3C
KIFC3
KIRREL1
KLHL25
KLHL29
KLHL42
KRT18
KRT18P4
KRT8
LDLR
LDLRAD4
LGR6
LHX2
LHX9
LIMD2
LIMS2
LINC00351
LINC00535
LINC00620
LINC00665
LINC01031
LINC01096
LINC01775
LINC01823
LINC02381
LINC02618
LINC02776
LINGO1
LONP2
LRP5L
LRRC20
LRRC43
LRRC4B
LRRC8A
LTB
LUZP1
LY6E
LZTR1
MADD
MANEAL
MAP4
MAP4K4
MAP7D1
MAPK11
MAPK12
MAPK1IP1L
MAPK3
MAPK8IP2
MAPK8IP3
MAPKAP1
MAPKAPK2
MARK1
MARK4
MARVELD1
MATN4
MBD3
MBTD1
MC1R
MCM3
MCRIP1
MEAK7
MED15
MED22
MEF2C
MEIS2
MET
METRNL
METTL27
MFNG
MFSD11
MGAT3
MGAT4A
MGAT5
MGRN1
MIA
MICAL1
MIF
MIR181A2HG
MIR4435-2HG
MKNK1
MLYCD
MMP11
MMP19
MON1B
MPP3
MPV17L2
MRAS
MRC2
MROH8
MRPL58
MRPS2
MRPS31P4
MSMO1
MSX1
MTCH1
MTFP1
MTMR10
MTRES1
MTRF1L
MTSS2
MTUS1
MUC20
MUS81
MYBL2
MYH10
MYO1C
MYSM1
NAA10
NAA80
NAAA
NADK
NAGPA
NAT14
NAT8L
NATD1
NBPF11
NBPF8
NCLN
NCOA1
NCOR2
NDE1
NDUFAF6
NECTIN2
NEURL1
NFATC1
NINL
NISCH
NKD2
NKX2-3
NKX2-5
NMI
NMT1
NOP14
NOSIP
NOTCH3
NPAS1
NPHP4
NPTX1
NRAV
NRIP1
NSUN5
NT5M
NTHL1
NUP188
NUP88
NYNRIN
ODCP
OGFR
OGN
OMG
OPA3
ORAI2
ORAI3
P2RY1
P3H3
PACS2
PACSIN2
PALD1
PANX2
PARP6
PARP9
PARVA
PARVB
PCBP4
PCED1A
PCMTD1
PCOLCE
PCSK5
PDAP1
PDCL3P4
PDE4A
PDLIM4
PDPR
PDXK
PFKL
PGAP6
PGM5
PHACTR2
PHACTR4
PHC2
PHF21B
PHGDH
PHLDB1
PHLPP1
PHTF2
PHYHD1
PHYHIPL
PI4KA
PICK1
PIEZO1
PIGG
PITX1
PKD2
PLA2G6
PLCD3
PLCXD2
PLEKHG3
PLEKHM1
PLEKHM2
PLEKHO1
PLIN2
PLIN3
PLLP
PLSCR1
PMEPA1
POGLUT1
POLDIP3
POLN
POLRMT
POR
POU2F2
PPFIBP1
PPIF
PPIL2
PPM1E
PPM1H
PPM1M
PPP1CA
PPP1R16A
PPP6R2
PRDX3
PROCA1
PRR14L
PRR29
PRRT4
PSPC1
PTGER3
PTK2
PTK2B
PTK7
PTPN9
PTPRF
PVALB
PVT1
PWWP2B
PXDC1
QDPR
QTRT2
R3HCC1
R3HCC1L
R3HDM4
RAB15
RAB18
RAB34
RAB3IL1
RAB6B
RANBP17
RAP1GAP2
RAPGEF1
RARA
RASGRF1
RASL10B
RASSF5
RBAK
RBFOX3
RBM38
RBM47
RCC2
RDM1P2
REEP4
RELT
REPS1
RERE
RETREG3
RGS10
RHEBP2
RIC8B
RILPL2
RIMKLA
RIMS2
RIPK1
RIPK4
RIPOR1
RMND5B
RNF115
RNF135
RNF216
RNF220
RNFT1-DT
RNPEPL1
ROBO3
ROR2
RP9P
RPA2
RPAP1
RPH3AL
RPL15P3
RPL19P14
RPL21P28
RPL5P28
RPL7AP30
RPL7P44
RPL7P52
RPRML
RPS12P3
RREB1
RTN4IP1
RUNX3
RXRA
S100A11
SAMD9
SAMSN1
SARS2
SART1
SCAND2P
SCARA3
SCFD2
SCHIP1
SDHD
SDSL
SEC22A
SECTM1
SELENBP1
SELENON
SELENOWP1
SEMA4C
SENP6
SEPTIN9
SERINC2
SERP2
SERPINH1
SETD2
SFN
SFXN1
SGSM2
SH2D4A
SH3BP1
SH3BP2
SH3GLB2
SH3PXD2A
SHB
SHC2
SHFL
SHISA2
SHISA5
SHISA8
SIK3
SIRPA
SLAIN1
SLC12A7
SLC15A4
SLC16A6
SLC19A1
SLC1A4
SLC1A5
SLC22A23
SLC24A1
SLC25A18
SLC25A19
SLC25A42
SLC25A6
SLC26A11
SLC2A6
SLC35C1
SLC35D1
SLC36A1
SLC38A3
SLC41A3
SLC6A8
SLC9A1
SLC9A3R1
SLIT2
SMAD3
SMARCA4
SMARCD3
SMCHD1
SMO
SNAP25
SND1
SNRNP200
SNTG2
SNX11
SNX29
SORBS3
SOWAHD
SP9
SPATA4
SPATA5
SPECC1L
SPEN
SPIRE2
SPNS2
SPPL2B
SRC
SRF
SRGAP2
SSH3
SSR4P1
STAG1
STAT1
STC2
STMN3
STRA6
STX10
STX11
STX18
STXBP4
SUFU
SULT4A1
SUMO1
SURF1
SUSD6
SUV39H1
SYDE1
SYNPO2L
SYNRG
SYPL2
SYTL1
TACC2
TACC3
TAMALIN
TASOR
TBC1D2
TBC1D9B
TBKBP1
TBX21
TBX3
TBX4
TBXA2R
TCF20
TCTN1
TEAD2
TEAD4
TECPR2
TEDC1
TET2
TET2-AS1
TGFB3
TGFBRAP1
TGIF1
TGIF2
THAP4
THAP9
THRA
TIAM2
TICRR
TIGD5
TIMM44
TJP1
TK2
TLCD2
TLCD3A
TLE3
TLE5
TLN2
TLNRD1
TM6SF2
TM7SF2
TM9SF1
TMCO4
TMED9
TMEM120B
TMEM121
TMEM189
TMEM245
TMEM63A
TMSB15A
TMSB4X
TMUB1
TNIP2
TNNT1
TNPO2
TNRC6B
TOE1
TP53I13
TP73
TRADD
TRAF3IP1
TRIM14
TRIM26
TRIM32
TRIM41
TRIM65
TRMT10B
TRMU
TRPV2
TRUB2
TSPAN11
TSPAN2
TSPAN9
TSR2
TTC25
TTC27
TTC39A
TTL
TUBBP5
TYRO3
UBBP1
UBC
UBE2D2
UBE2J2
UBL4A
UBL7
UBTD2
UBTF
UBXN6
UNC119B
UNC79
UPF1
USF2
USH1G
USP12
USP15
USP39
UTF1
UVRAG
VANGL1
VAPB
VASH1
VAX2
VEGFB
VEGFC
VPS13D
VPS18
VPS26B
VPS33B
VPS37D
VPS54
VPS9D1
VSTM2L
WDR24
WDR34
WDR45
WDR5
WDR74
WDR81
WIPF3
WRNIP1
XPO6
XRN1
XXYLT1
YARS1
YDJC
Z82217.1
ZBED1
ZBTB4
ZBTB42
ZBTB43
ZBTB7B
ZCCHC3
ZDHHC14
ZDHHC3
ZDHHC7
ZDHHC8
ZFHX2
ZFHX4
ZFP69
ZMIZ1
ZMYND11
ZNF134
ZNF16
ZNF180
ZNF197
ZNF202
ZNF212
ZNF219
ZNF222
ZNF232
ZNF239
ZNF252P
ZNF256
ZNF264
ZNF30
ZNF316
ZNF318
ZNF329
ZNF358
ZNF384
ZNF398
ZNF41
ZNF419
ZNF425
ZNF45
ZNF467
ZNF470
ZNF48
ZNF480
ZNF496
ZNF512B
ZNF516-DT
ZNF518B
ZNF548
ZNF549
ZNF550
ZNF561-AS1
ZNF629
ZNF692
ZNF707
ZNF710
ZNF736
ZNF764
ZNF767P
ZNF777
ZNF792
ZNF815P
ZNF829
ZNF845
ZNF853
ZNF888
ZP3
ZSWIM5
AC010336.1
ACAD8
AF131216.1
AKT2
AL138831.2
AL353689.3
AL627171.2
ARNTL
ARPP19
ATP5F1CP1
CDK5RAP1
CENPK
CEP72
CLN3
DCDC2
DHRS7B
DNASE2B
DNPEP
ERCC5
ERCC6
GGA2
GOLGB1
GRWD1
KCTD5
KIAA0408
LMOD1
MANBA
MANSC1
MARK3
MTARC2
MTHFD2L
PALMD
PM20D1
PRPF8
RAB3GAP1
RGL1
RPRM
SEMA4B
SLC16A7
SLC1A3
SMAP2
SMPDL3B
TATDN2
TCHP
TEF
TMEM201
TOM1L2
TPT1P4
TUBA1C
ZBED9
ZNF37BP
ZNF678
A1BG-AS1
AACS
AAMP
AAR2
AARS2
AARSD1
ABCA11P
ABCA3
ABCA7
ABCB6
ABCB8
ABCC6P2
ABCF1
ABCF2
ABHD12
ABHD16A
ABHD17AP6
ABRAXAS2
AC000085.1
AC000089.1
AC000093.1
AC000403.1
AC002075.2
AC002310.2
AC002550.1
AC002558.1
AC002558.2
AC003956.1
AC004039.1
AC004057.1
AC004067.1
AC004080.6
AC004112.1
AC004223.2
AC004223.4
AC004241.2
AC004257.1
AC004471.1
AC004765.1
AC004801.6
AC004825.3
AC004832.6
AC004839.2
AC004846.2
AC004863.1
AC004865.2
AC004884.2
AC004890.1
AC004898.1
AC004908.1
AC004908.2
AC004918.3
AC004943.1
AC004943.2
AC004951.1
AC004967.1
AC005019.1
AC005046.1
AC005062.1
AC005096.1
AC005253.1
AC005253.2
AC005261.3
AC005280.2
AC005324.4
AC005332.3
AC005332.6
AC005343.1
AC005393.1
AC005537.1
AC005632.3
AC005730.3
AC005740.3
AC005785.1
AC005790.1
AC005828.1
AC005920.2
AC005972.2
AC006001.2
AC006058.3
AC006059.1
AC006059.5
AC006111.2
AC006213.1
AC006213.3
AC006213.4
AC006305.1
AC006449.2
AC006449.6
AC006512.1
AC006547.2
AC006994.1
AC007066.1
AC007106.1
AC007192.1
AC007298.1
AC007318.1
AC007319.1
AC007336.1
AC007389.3
AC007405.2
AC007406.5
AC007622.2
AC007655.2
AC007663.3
AC008026.3
AC008035.1
AC008105.3
AC008514.2
AC008686.1
AC008736.1
AC008738.7
AC008758.4
AC008764.6
AC008764.8
AC008770.4
AC008915.3
AC009041.3
AC009053.2
AC009118.3
AC009120.5
AC009163.5
AC009244.1
AC009269.4
AC009269.5
AC009283.1
AC009318.2
AC009362.1
AC009403.1
AC009630.4
AC009652.1
AC009686.2
AC009754.2
AC009961.1
AC010173.1
AC010186.3
AC010203.1
AC010203.2
AC010287.1
AC010323.1
AC010325.1
AC010326.3
AC010327.6
AC010442.3
AC010542.4
AC010547.1
AC010623.1
AC010655.1
AC010655.4
AC010680.5
AC010969.2
AC010969.3
AC010976.1
AC010999.2
AC011005.4
AC011290.2
AC011330.2
AC011374.1
AC011444.1
AC011447.1
AC011487.1
AC011603.3
AC011700.1
AC011825.2
AC011939.1
AC011979.1
AC012085.1
AC012087.2
AC012181.1
AC012181.2
AC012309.1
AC012321.1
AC012379.2
AC012417.1
AC012462.3
AC012488.2
AC012508.1
AC012510.1
AC013391.2
AC013489.1
AC015522.1
AC015660.2
AC015813.2
AC015871.3
AC015912.3
AC016065.1
AC016582.2
AC016747.4
AC016773.2
AC016876.3
AC017099.1
AC018628.2
AC018653.3
AC018693.1
AC018766.1
AC018809.2
AC019131.3
AC019205.1
AC020765.2
AC020909.3
AC020917.2
AC020922.1
AC020928.1
AC021074.3
AC021087.3
AC022098.1
AC022137.3
AC022167.3
AC022400.5
AC022973.4
AC023043.1
AC023494.1
AC023509.3
AC023510.2
AC023590.1
AC023593.1
AC023632.5
AC023906.5
AC024022.1
AC024267.4
AC024267.6
AC024475.3
AC024558.2
AC024940.5
AC025165.4
AC025171.5
AC025287.2
AC025449.1
AC026341.1
AC026401.3
AC026403.1
AC026748.3
AC026954.2
AC026992.2
AC027228.2
AC027237.3
AC027307.2
AC027319.1
AC027644.4
AC027682.6
AC027796.1
AC034159.2
AC034236.1
AC040160.1
AC040162.3
AC040169.3
AC053527.2
AC062029.1
AC062037.3
AC063944.2
AC063948.1
AC063962.1
AC064807.1
AC064836.3
AC067852.2
AC067852.5
AC068051.1
AC068389.3
AC068620.3
AC068700.2
AC068790.5
AC068790.6
AC068946.2
AC068989.1
AC069218.1
AC069224.1
AC069228.1
AC069281.2
AC069288.1
AC069499.2
AC069503.1
AC069503.2
AC072022.2
AC072026.2
AC073111.3
AC073140.2
AC073270.2
AC073349.4
AC073508.3
AC073585.1
AC073610.1
AC073878.2
AC073934.1
AC074194.1
AC078785.2
AC078802.1
AC078817.1
AC078927.1
AC078983.1
AC079035.1
AC079089.1
AC079174.2
AC079203.1
AC079601.1
AC079684.1
AC079781.5
AC079841.2
AC080005.1
AC080023.2
AC080112.4
AC083801.2
AC083843.2
AC083862.2
AC084018.2
AC084876.1
AC087190.3
AC087257.1
AC087276.3
AC087286.2
AC087491.1
AC087500.1
AC087721.2
AC087741.2
AC089984.2
AC090498.1
AC090517.2
AC090517.4
AC090607.5
AC090617.3
AC090739.1
AC090954.1
AC091057.1
AC091185.1
AC091390.2
AC092032.2
AC092069.1
AC092140.1
AC092329.4
AC092338.2
AC092422.1
AC092573.1
AC092587.1
AC092604.1
AC092667.1
AC092718.3
AC092718.4
AC092718.8
AC092755.2
AC092794.2
AC092828.1
AC092849.1
AC093249.4
AC093311.1
AC093591.1
AC093627.4
AC093635.1
AC093673.1
AC093677.3
AC093752.2
AC093835.1
AC093909.1
AC095032.1
AC095057.3
AC096637.2
AC096649.1
AC096708.3
AC096992.2
AC097375.3
AC097376.2
AC098484.3
AC098590.1
AC098934.1
AC098934.3
AC099066.3
AC099329.1
AC099332.1
AC099340.1
AC099677.1
AC099786.1
AC100778.2
AC100800.1
AC100835.2
AC103703.1
AC103739.2
AC103810.1
AC103858.2
AC104073.3
AC104073.4
AC104116.1
AC104134.1
AC104332.1
AC104452.1
AC104763.2
AC104825.1
AC104836.1
AC105052.3
AC105339.2
AC106779.1
AC106820.6
AC106872.3
AC106872.6
AC106886.3
AC106886.6
AC107021.2
AC107032.2
AC107068.2
AC107071.1
AC107373.2
AC107419.1
AC107959.1
AC108063.1
AC108449.2
AC108477.2
AC108693.1
AC109133.1
AC109347.1
AC109460.1
AC109460.3
AC109587.1
AC109631.1
AC109635.7
AC110285.2
AC110792.2
AC112191.3
AC112484.3
AC113139.1
AC113189.4
AC113367.1
AC113404.3
AC113410.1
AC113410.4
AC113935.1
AC114271.1
AC114490.2
AC115618.1
AC116036.1
AC116158.3
AC116533.1
AC116562.3
AC120042.2
AC120498.8
AC121493.1
AC123768.4
AC124016.1
AC124045.1
AC124248.2
AC124798.1
AC125494.3
AC125611.2
AC126696.3
AC126773.4
AC127024.5
AC127035.1
AC127459.1
AC127502.2
AC128687.2
AC130650.2
AC131025.1
AC131025.3
AC131392.1
AC131971.1
AC132192.1
AC132192.2
AC132812.1
AC132938.7
AC133550.2
AC134349.2
AC135068.6
AC135279.4
AC135983.2
AC135983.3
AC135983.4
AC136475.2
AC136475.7
AC136475.9
AC136624.1
AC136632.2
AC137630.1
AC138230.1
AC138393.3
AC138470.2
AC138866.2
AC139256.1
AC139491.2
AC139530.1
AC139530.3
AC139769.2
AC139795.2
AC139795.3
AC139887.2
AC141002.1
AC145207.3
AC145207.5
AC146944.1
AC146949.1
AC211433.1
AC211476.2
AC231533.1
AC232271.1
AC233280.1
AC233699.1
AC234644.2
AC241952.1
AC243830.2
AC243919.1
AC244090.2
AC244093.1
AC244102.4
AC244669.1
AC245014.1
AC245060.5
AC245060.7
AC245407.2
AC246785.3
AC254633.1
ACAD9
ACADS
ACADVL
ACAP3
ACBD3-AS1
ACBD6
ACCS
ACD
ACP2
ACTA2
ACTC1
ACTN4
ACYP1
ACYP2
ADAM15
ADAM20
ADAM21
ADAR
ADAT1
ADAT3
ADCK1
ADCK5
ADGRE5
ADGRL1
ADH1A
ADIPOR2
ADNP
ADPRHL1
ADPRS
ADRM1
AEN
AF228727.1
AF241726.2
AF274858.1
AFDN-DT
AFG3L1P
AFG3L2
AFP
AGA
AGAP10P
AGBL2
[truncated: 3,242 more rows]
