# Supplementary material
Source: Research Square preprint supplement (doi:10.21203/rs.3.rs-8745251/v1)
Supplement: Supplementary file 3 [file bfcb433f04611a4df65a5d47.xlsx]

## Sheet: Sheet1
C19orf12
DNAJB12
MAST2
MYCBP2
NCOA2
PLD1
SLC46A3
SPATA13
AARS1
ABCC2
ABL2
ABLIM1
ACVR1B
AP3D1
ARHGAP20
ASB13
BARHL2
BCAT2
BCORL1
BOC
CACNB2
CCDC8
CDK5RAP2
CHST2
DNM2
DPYSL5
DSTYK
EEF2K
EFL1
EFNA4
FAAP20
FOXJ2
GALK1
GINS3
GRAMD1B
HLX
HMOX2
IFT46
KCTD4
LMNA
MANBAL
MAST1
MGA
MMS22L
MYC
NANS
NEK9
NF2
NLRX1
NT5C2
OCEL1
PAK1
PHF1
PIK3AP1
PLCL2
POLR3H
PSAP
RRP12
SCAP
SH2B1
SHROOM1
SIAH2
SLC7A1
SMAP1
SMG1
SOX4
TFEB
THEM4
TMEM62
TNFRSF1A
TP53BP1
TRERF1
TSPAN5
TXNRD3
UTP4
WASF2
ZMYND8
ZNF827
CENPA
RFXAP
ABHD4
AC008543.1
AC073651.1
ACTR1B
AMDHD1
ANAPC1
ANAPC7
AP2M1
AP4E1
ARHGEF11
ASTE1
ATIC
ATP13A2
ATP6V0E2
B4GALT7
BAG1
BCKDHA
BCRP2
BMP4
BRPF1
C1D
C7orf26
CARS2
CCDC146
CERCAM
CERKL
CFAP58-DT
COA7
COG1
DACT3
DDRGK1
DDX10
DESI1
DOLPP1
DPH7
DUS3L
DZIP1L
EBAG9
EGR1
ELK1
EMC9
FAM104B
FAM189B
FAM53A
FBXL12
FBXO34
FIRRE
FOXK2
FOXRED2
GAR1
GOLPH3L
GPR137
GPT2
GTSE1
GZF1
HLA-C
HMBS
HPS3
HPS6
HROB
HSD17B10
HYAL3
IFIT1
IFT27
IKZF2
ILKAP
INSM2
IP6K1
IVD
KANSL3
KATNBL1
KCNJ8
KIF2C
LASP1
LIN7B
LINC01220
LMAN2L
LRRC8D
LZTS2
MAEA
MKI67
MMP24OS
MORC2
MSANTD4
MTIF2
MYPOP
NAGLU
NAGS
NAT9
NFKBIE
NGRN
NRDC
NRTN
NSL1
NT5C3B
OIP5-AS1
OTUD5
P3H4
PDCD11
PDX1
PGAM5
PHF21A
PIGS
PLTP
PMS2P4
POLD4
PPP1R8
PPP2R5B
PRDM4
PRIM2
PRKAB1
PRMT5
PRPF4
PTGIS
PTPN23
RAB29
RAB35
RAD51D
RBCK1
RGL2
RHOV
RNH1
ROGDI
RPL41
RRN3P1
RRP1
RUFY1
RUSC2
SAP130
SAT1
SCLT1
SCN3B
SCRN2
SEC24C
SFPQ
SIPA1L3
SLC2A1
SLC35E3
SMC1A
SMG9
SNHG7
SNX1
SRSF5
STK11IP
STYXL1
SUN2
SUOX
SUPT6H
TBC1D22B
TERC
TEX264
TFCP2
TJAP1
TMEM94
TRAP1
TRIM4
TRMT61B
TTC30B
TUBAP5
TWF1
UCK1
WIPI2
WRAP53
ZNF133
ZNF189
ZNF445
ZNF446
ZNF570
ZNF672
ZNF703
ZNF747
ZNF839
ZSCAN31
