# Supplementary material
Source: Research Square preprint supplement (doi:10.21203/rs.3.rs-8745251/v1)
Supplement: Supplementary file 4 [file fff890e0bc68c515103fd23e.xlsx]

## Sheet: PN.SE.gene
ABI1
AC000085.1
AC005077.3
AC005099.1
AC005181.1
AC005343.1
AC005746.3
AC005821.2
AC005839.1
AC006364.1
AC006967.2
AC007151.1
AC007683.1
AC008080.2
AC008649.2
AC008798.1
AC008798.2
AC008957.1
AC009019.2
AC009054.2
AC010598.1
AC011472.2
AC011933.2
AC011933.4
AC012184.1
AC017007.5
AC018946.1
AC020629.1
AC020741.1
AC021876.1
AC022018.1
AC022022.1
AC022217.1
AC022809.1
AC023509.5
AC026124.2
AC027124.2
AC027243.2
AC027290.2
AC027455.1
AC032044.2
AC034186.1
AC037487.2
AC040904.1
AC048383.1
AC055866.1
AC068620.3
AC073140.2
AC079035.1
AC079449.1
AC079866.1
AC079915.1
AC087477.2
AC087741.2
AC090198.1
AC091607.2
AC093154.1
AC093155.3
AC093246.1
AC093249.1
AC097359.1
AC099066.3
AC099684.2
AC103591.3
AC104779.1
AC105081.1
AC107871.2
AC108067.1
AC109326.1
AC114495.1
AC116036.1
AC117465.1
AC118658.1
AC124916.2
AC133540.1
AC134508.1
AC146507.3
AC234063.1
AC242988.2
ACBD3
ACKR2
ADAMTS9
ADCY9
ADGRL2
ADSS2
AHCTF1
AIDAP1
AIMP1P1
AKAP13
AL009179.2
AL021808.1
AL021918.2
AL035090.1
AL050331.1
AL078624.1
AL109936.8
AL121936.1
AL133260.2
AL133304.3
AL133325.3
AL133334.1
AL136115.2
AL137003.1
AL138785.1
AL139806.1
AL157904.1
AL157936.1
AL158212.5
AL160254.1
AL160391.1
AL160408.2
AL162400.2
AL353689.3
AL353754.1
AL354702.1
AL354811.1
AL354936.1
AL354950.3
AL355314.2
AL356754.2
AL356986.1
AL358216.1
AL359510.1
AL391058.1
AL392103.1
AL445305.1
AL445588.1
AL450309.1
AL512343.1
AL512430.1
AL512634.1
AL513128.2
AL513542.1
AL513548.1
AL592295.2
AL592546.3
AL596188.1
AL596247.1
AL596266.1
AL606970.3
AL627171.2
AL627311.1
AL662890.1
AL683807.2
AL831737.1
ALPK1
ANG
ANKHD1
ANKRD33B-AS1
ANKRD9
ANTXRLP1
AP001885.1
AP003778.1
AP1AR
AP1S3
APLP2
APOLD1
APP
ARHGAP35
ARHGEF12
ARHGEF18
ARHGEF3
ARID1B
ARID3B
ARID4B
ARIH1
ARL8B
ATXN1
BAG4
BBC3
BCL11A
BCL2L13
BCL9
BMPR1A
BTRC
BX004807.1
BX323046.1
C6orf201
CACHD1
CALCOCO1
CAMKMT
CAMTA1
CATSPERE
CCDC144NL-AS1
CCDC200
CD70
CD83P1
CDC42BPA
CDKN2C
CFL1P4
CHCHD2P3
CHCHD2P9
CHD7
CHTOP
CLASP2
CLYBL-AS2
CMTM4
CNIH4
COA8
COL2A1
COQ8A
COX5BP7
CPEB3
CR392039.1
CR936218.2
CREBBP
CRKL
CSTF3
CTNNA1
CXorf56
CYCSP55
CYTH1
DACH1
DCAF6
DCHS2
DDX10
DERA
DESI2
DIP2A
DNAH14
DNAJA1P6
DNAJB6
DNAJC8
DR1
DSE
DST
DTL
DYNC2H1
EBLN2
EDAR
EEF1E1
EEF2
EFNA5
EIF2B3
ELOCP18
ENAH
ENO1P1
EPCAM-DT
EPHA3
EPS8
ERC1
ESYT2
EXOC5
EXTL2P1
EYA3
FABP5P15
FAM120AOS
FAM160B1
FAM193B
FAM53A
FAR2
FERMT2
FGFR2
FLYWCH2
FNBP1L
FO393422.1
FOXC1
GGPS1
GGT5
GHSR
GLI2
GMDS
GMEB1
GNA12
GNAQ
GNB1
GNGT2
GOLGA4
GOLM1
GON4L
GPATCH8
GPR180
GPRIN2
GUCY2D
H2AC6
H3-3A
H3C9P
H3P28
HACD3
HCG22
HDLBP
HECW2-AS1
HIGD1AP16
HIPK3
HIVEP2
HJV
HLX
HMGB1P22
HMGB1P8
HMGB3P32
HMGCR
HMGN1P2
HNRNPA1P62
HNRNPA3P8
HS6ST2
HSDL1
HSPE1P27
HTR1DP1
IFNAR2
IGF2BP3
IL26
IREB2
ITGAV
JARID2
KANSL1
KAT6B
KCTD2
KDM6A
KIAA0232
KIAA1549
KLHL15
KRT18P16
KRT18P57
LAMA3
LAMC1
LAMC2
LAMC3
LBR
LCOR
LINC00184
LINC00358
LINC00383
LINC00402
LINC00533
LINC00862
LINC00899
LINC01012
LINC01356
LINC01381
LINC01507
LINC01556
LINC01578
LINC01637
LINC01703
LINC01798
LINC01816
LINC01873
LINC02019
LINC02086
LINC02268
LINC02322
LINC02642
LINC02811
LINC02817
LINC-PINT
LMBR1
LRBA
LRIG2
LRPPRC
LRRC28
LRRC37A
LRRC8C
LRRFIP1
LUNAR1
LUZP1
MAML1
MAP2K5
MAP3K4
MAP4
MAP4K4
MAPK1
MARK3
MAST4
MBNL2
MCUR1
MED18
MEIOB
METAP1D
Metazoa_SRP
MICOS10
MINDY3
MIR1278
MIR1303
MIR3143
MIR3663HG
MIR3688-1
MIR4474
MIR4503
MIR4714
MIR548D2
MIR5739
MIR6070
MIR6731
MIR7852
MNX1-AS2
MPZL1
MRTFA
MRTFA-AS1
MSH2
MTCYBP4
MTF2
MTMR3
MYCBP2
MYL4
MZT1P1
NAA35
NCMAP
NCOA2
NDUFA9P1
NDUFB4
NEDD9
NEO1
NFIA
NFYB
NHP2P2
NHSL1
NKAIN1
NKTR
NKX2-3
NLGN1
NME1
NPAS3
NPEPPS
NR1I2
NSD1
NUFIP1
ONECUT3
OR2E1P
OR2V2
OR6S1
OSBPL2
OSBPL9
OTUD7B
PACSIN2
PAN3
PARD6B
PARP1
PAX3
PBX1
PBX3
PCDH10
PCDH9-AS2
PCDH9-AS4
PCMT1
PDCL3P5
PDHA1P1
PDIK1L
PDZD8
PEX14
PHACTR2P1
PIGL
PIK3CB
PITPNB
PLCE1
PP2672
PPARG
PPP1R13B
PPP2R2D
PRDM12
PRDM16
PRELID3BP3
PRKAA2
PRKAR2A
PRPS1
PRRC2B
PRRC2C
PRSS16
PSEN2
PSME4
PTBP3
PTMA
PTP4A2
PTPN9
PUM1
PYY
RAB10
RAB42
RAC1P8
RAC2
RAD51B
RAF1
RAMAC
RAPGEF5
RAPGEF6
RBM15
RBM26
RBM4
RBM6
REPS1
REV1
RFX3
RGS17
RHEB
RN7SKP49
RN7SL122P
RN7SL372P
RN7SL735P
RN7SL751P
RN7SL786P
RNA5SP20
RNF182
RNF38
RNU1-108P
RNU2-43P
RNU2-59P
RNU2-62P
RNU4-34P
RNU4-83P
RNU6-1304P
RNU6-1322P
RNU6-155P
RNU6-15P
RNU6-210P
RNU6-386P
RNU6-387P
RNU6-440P
RNU6-471P
RNU6-54P
RNU6-604P
RNU6-856P
RNU6-929P
RNU6-968P
RNU6-999P
RNU7-19P
RNY3P14
RNY4P6
ROBO1
RPGRIP1
RPL10AP6
RPL12P2
RPL14P5
RPL21P110
RPL21P116
RPL22P19
RPL23AP31
RPL23AP86
RPL29P30
RPL31P58
RPL32P28
RPL35AP31
RPL6P5
RPPH1-3P
RPS15AP1
RPS15AP30
RPS15AP38
RPS23P10
RPSAP2
RPSAP52
RPSAP65
SAT1
SCAF8
SCG2
SDCCAG8
SDE2
SEC63
SEMA3A
SEPTIN6
SESTD1
SFMBT2
SHISA5
SIPA1L2
SIX4
SLC16A1
SLC16A2
SLC25A17
SLC25A26
SLC30A10
SLC35E4
SLC7A1
SLX4IP
SMIM10
SMIM28
SMURF1
SMURF2
SNORD56B
SOD2
SP3
SPCS2P4
SPECC1L
SSR3
STK32C
STN1
STRN3
STX8
SUMO1P1
TBC1D22A-AS1
TBC1D4
TBCE
TBPL2
TBX4
TCF7L2
TENT2
TGDS
THRA1/BTR
THRAP3
TJP1
TLE4
TMEM216
TMEM219
TMEM245
TNIK
TNRC6B
TOB2P1
TP53BP2
TPD52L1
TPTEP2
TRAPPC10
TRIM37
TRIO
TRPS1
TSC22D2
TTC28
TTLL1
TUBB2A
TYRO3P
U2SURP
U8
UBE2D1
UBE2H
UBE3C
UBL3
UBR5
UBTD2
UIMC1
USP24
USP32
USP6NL
USP7
UVRAG
VN1R10P
VRK1
WAPL
WIPI1
WLS
WNT10A
YPEL5P1
Y_RNA
YWHAE
YY1
Z75741.1
Z83839.2
Z92846.1
Z99916.2
ZBTB21
ZBTB8OSP1
ZC3H3
ZEB1
ZNF280C
ZNF326
ZNF395
ZNF644
ZNF652
ZNF76
ZNF839
ZNF877P

## Sheet: PN_del.SE.gene
AATBC
ABCF2P1
AC004832.2
AC005077.3
AC005165.1
AC005224.3
AC006974.1
AC007683.1
AC007919.2
AC008798.1
AC010132.1
AC011472.2
AC011603.3
AC011933.4
AC011979.2
AC012625.1
AC018816.1
AC018946.1
AC020916.1
AC022217.1
AC027124.2
AC027801.5
AC048383.1
AC064874.1
AC069148.1
AC073593.1
AC078785.2
AC087477.2
AC091607.2
AC093249.1
AC093414.1
AC099066.2
AC100832.1
AC104169.1
AC105081.1
AC106772.1
AC106818.1
AC107871.2
AC109326.1
AC115099.1
AC122713.1
AC124067.1
AC130467.1
AC133540.1
AC138393.2
ADAM1B
ADCY10
ADH5P2
ADSS2
AF111167.1
AKAP13
AL009179.2
AL021918.2
AL022100.2
AL031229.1
AL034417.3
AL035414.1
AL049543.1
AL078624.1
AL078624.2
AL121885.3
AL133351.1
AL136985.2
AL137100.3
AL137785.1
AL138693.1
AL139098.2
AL139806.1
AL157831.3
AL157904.1
AL158212.5
AL158835.1
AL159166.1
AL160254.1
AL160391.1
AL162427.1
AL353689.3
AL354771.1
AL354810.1
AL354936.1
AL355298.1
AL356102.1
AL356986.1
AL358216.1
AL359198.2
AL359208.1
AL359510.1
AL359834.1
AL390957.1
AL392103.1
AL450309.1
AL451007.2
AL451046.2
AL512288.2
AL512452.1
AL512634.1
AL513188.1
AL513534.2
AL513548.1
AL592295.2
AL592546.3
AL596188.1
AL606517.1
AL662907.1
AL713899.1
AL831737.1
AP002761.1
AP003357.1
AP003499.1
AP003778.1
AP3D1
ARGFXP1
ARID3B
ARID4B
ARIH2
ARV1
ATP5PF
AUTS2
B4GALT5
BAHCC1
BBX
BCOR
BHLHB9P1
BMP7
BRIP1
BX323046.1
BX323046.2
C1orf21
C5orf15
C6orf201
CABCOCO1
CACHD1
CACNA1D
CACYBPP1
CASQ2
CATSPERE
CBR3-AS1
CCDC144NL-AS1
CD83P1
CDC42BPA
CDK15
CELA1
CEP85L
CFL1P4
CHCHD2P9
CLYBL-AS2
CMTM4
CMTM7
COA7
COL2A1
COX6B1P1
COX6CP17
CR936218.3
CREB5
CYTH1
DACH1
DCAF6
DCHS2
DENND1B
DESI2
DNAJC8
DNMBP
DST
DYRK1A
EBF1
EEF2
EEF2K
EFNA5
EGLN1
EML4
ENAH
ENO1P1
ENOX1
EPCAM-DT
EPHA3
EPN2
ESRRB
ESYT2
EXTL2P1
EYA4
F5
FAM102A
FAM204CP
FGFR2
FLNB
FLYWCH2
FOCAD
FOXP2
FRMD4B
FTH1P2
GBF1
GGA1
GHSR
GLG1
GMDS
GNA12
GNAQ
GNGT2
GPRIN2
GUCY2D
H1-0
H3-3A
H3C9P
HCG22
HECTD2
HIVEP2
HLA-DOB
HLCS
HLX
HMGB1P22
HMGB1P38
HMGN1P28
HNRNPA1P62
HNRNPA3P5
HNRNPA3P8
HS2ST1
HS6ST2
HULC
IDE
IFNAR2
IFT22
IKZF3
IL16
INTS13
IQCH-AS1
IRAIN
IREB2
IRF2BP2
ITPKB
JAK1
KANSL1
KCTD2
KDM6B
KDM7A
KHDRBS1
KIAA0232
KIFC3
KLF9
KRBA1
LAMC1
LAMC2
LAPTM5
LGALS8
LGR4
LGR4-AS1
LINC00358
LINC00383
LINC00395
LINC00398
LINC00448
LINC00582
LINC01303
LINC01381
LINC01507
LINC01556
LINC01563
LINC01700
LINC01703
LINC01798
LINC01816
LINC02086
LINC02268
LINC02322
LINC02642
LINC02774
LINC02811
LNCARSR
LOXL1
LRMDA
LRRC28
LRRC37A
LRRFIP1
LUNAR1
LYST
MAFA
MAP3K21
MAP4
MAP4K3-DT
MAST2
MCUR1
MDM4
MECOM
MED18
METAP1D
Metazoa_SRP
MFSD4B
MICOS10
MIR1288
MIR297
MIR3663HG
MIR3688-1
MIR4309
MIR4450
MIR4474
MIR4642
MIR4677
MIR4735
MIR548Q
MITF
MKRN1
MMS19
MNX1-AS2
MOSMO
MRPS10P1
MRPS17P3
MRPS17P9
MRTFA
MYPN
NAA20
NCOA2
NDUFA9P1
NDUFB1P2
NDUFB4
NFIA
NKAIN1
NLGN1
NLGN1-AS1
NOP56P1
NPAS3
NTN1
NUFIP1
OR2V2
OR5K2
OSBPL6
OSBPL9
PAN3
PAX3
PBX1
PBX3
PCBP1-AS1
PCDH9
PCDH9-AS2
PCDH9-AS3
PCDH9-AS4
PCGF3
PDE8A
PDZRN4
PHACTR2P1
PIM1
POLK
POM121L2
PPARG
PPIAP25
PPP1R16B
PPP2R2D
PRDM12
PRDM16
PRELID3BP3
PRICKLE1
PRKAR2A
PRKAR2B-AS1
PRKCI
PRKG1
PRPS1
PSEN2
PSMC1P13
PTPRG
QSOX2
RAC1P8
RAD51B
RAI1-AS1
RAPGEF4
RAPGEF5
RBFOX2
RBM20
RBM26
RERE
RHOA-IT1
RN7SL122P
RN7SL269P
RN7SL569P
RN7SL736P
RNA5SP131
RNA5SP305
RNA5SP341
RNF157
RNU1-108P
RNU1-141P
RNU2-43P
RNU2-58P
RNU2-59P
RNU4-34P
RNU4-40P
RNU4-83P
RNU6-1282P
RNU6-386P
RNU6-604P
RNU6-623P
RNU6-793P
RNU6-79P
RNU6-929P
RNU6-968P
RNU7-87P
RPL10AP6
RPL10P2
RPL22P19
RPL23AP58
RPL31P54
RPL31P58
RPL34P21
RPL35AP30
RPL35AP31
RPL3P6
RPL5P21
RPPH1-3P
RPS10-NUDT3
RPS15AP30
RPS15AP38
RPS23P3
RPSAP2
RPSAP37
RPSAP65
S100A10
SCG2
SDCCAG8
SDE2
SELENOK
SEPTIN7P6
SFMBT1
SIPA1L2
SIX4
SLC16A1-AS1
SLC16A2
SLC25A26
SLC9A9
SMIM10
SMURF2
SND1
SNORA31B
SNORD56B
SNRNP40
SNRPD2P2
SNRPEP6
SPCS2P4
SRMP2
ST6GALNAC3
STAMBPL1
STK32C
SUMO2P6
SUSD2
SYTL3
TARBP1
TARID
TBCD
TBX4
TCF7L2
TGDS
TGFBR3
THADA
THRA1/BTR
TIAM2
TLE4
TMEM216
TMIGD3
TNRC6B
TNRC6C
TOB2P1
TPD52L1
TRIM37
TRIO
TTC30A
TXNRD1
U2SURP
UBE2H
UBE3C
UBTD2
UCK2
USP32
VN1R10P
VN1R11P
VPS13D
WIPI1
WLS
WNK1
XRCC2
YPEL5P1
Y_RNA
YWHAE
ZBTB8B
ZC3H3
ZFX
ZNF644
ZNF76
