# Supplementary material
Source: Research Square preprint supplement (doi:10.21203/rs.3.rs-8745251/v1)

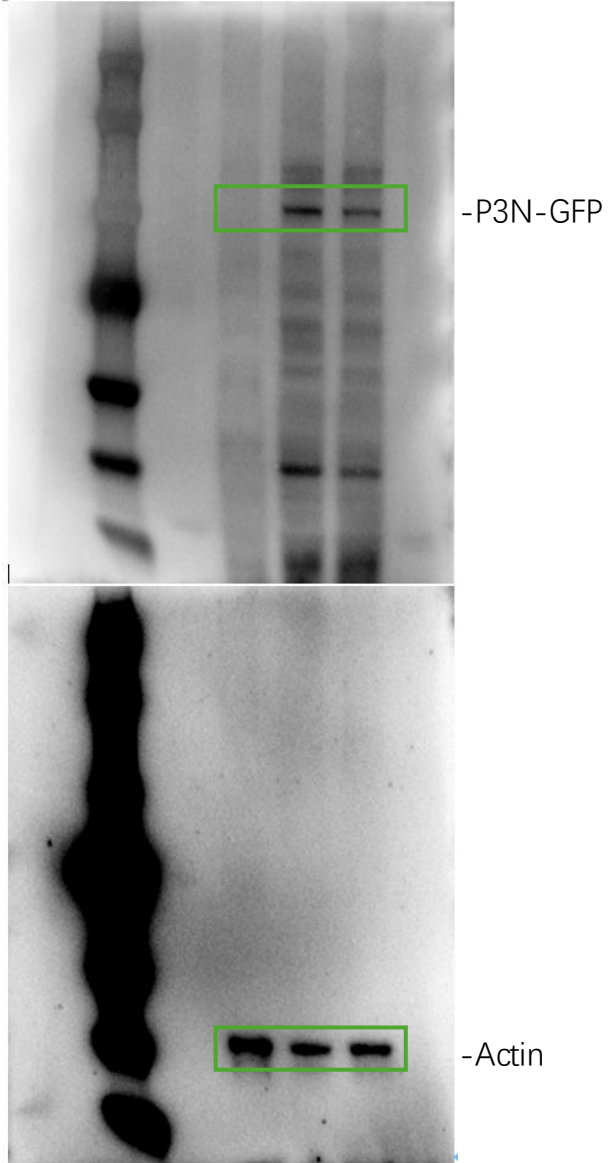

Figure 2B

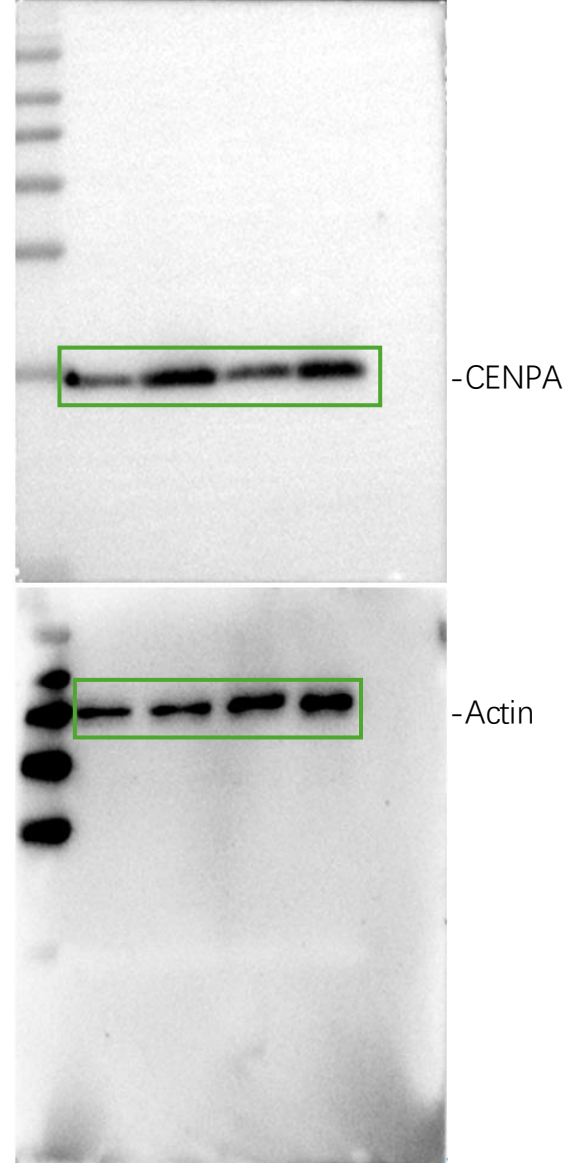

Figure 6C

Supplement: Supplementary file 2 [file e88820424793ce67f158070a.pdf]
